# Supplementary material for: One-step rapid synthesis of fluorescent silicon nanodots for a hydrogen peroxide-related sensitive and versatile assay based on the inner filter effect
Source: Royal Society of Chemistry journal article supplement (doi:10.1039/c9an00395a), 2019-01-01
Supplement: c9an00395a1.pdf [file c9an00395a1.pdf]

## Supplementary Information

### **One-step rapid synthesis of fluorescent silicon nanodots for hydrogen peroxide-related sensitive and versatile assay based on inner filter effect**

Haoyu Chen<sup>a</sup>, Li Wu<sup>a</sup>, Yuqi Wan<sup>a</sup>, Lulu Huang<sup>a</sup>, Ningxing Li<sup>c</sup>, Jinyang Chen<sup>a,b\*</sup>,  
Guosong Lai<sup>a</sup>

*<sup>a</sup>Hubei Key Laboratory of Pollutant Analysis & Reuse Technology, College of Chemistry and Chemical Engineering, Hubei Normal University, Huangshi 435002, PR China*

*<sup>b</sup>Key Laboratory of Analytical Chemistry for Biology and Medicine (Wuhan University), Ministry of Education, Wuhan 430072, PR China*

*<sup>c</sup>College of Chemistry and Chemical Engineering, Hunan University, Changsha 410082, PR China*

*\*Corresponding author. E-mail: chenjy@hbnu.edu.cn*

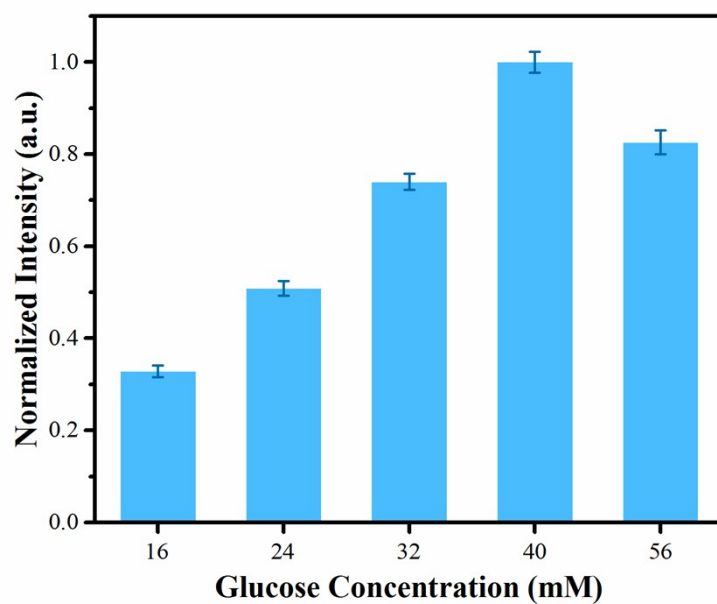

**Fig. S1.** Fluorescence intensity of SiNDs prepared using glucose with different concentrations.

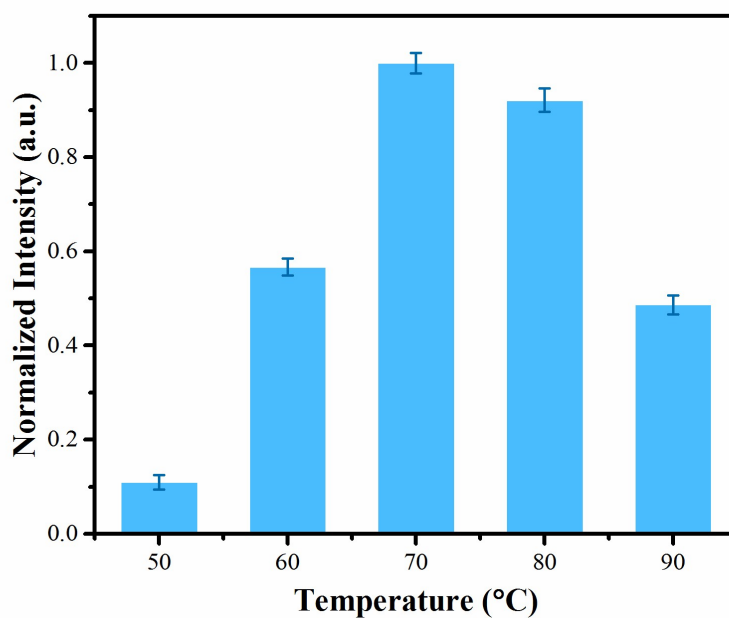

**Fig. S2.** Fluorescence intensity of SiNDs prepared at different temperatures.

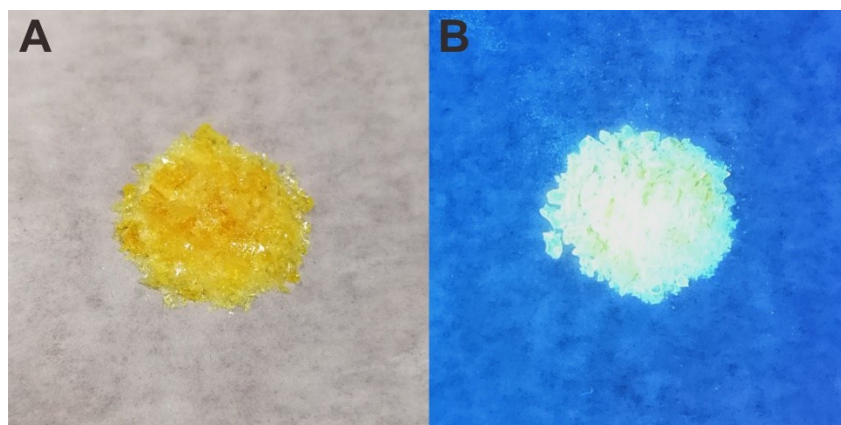

**Fig. S3.** Photographs of purified solid particles of SiNDs under irradiation with daylight (left) and UV light (right), respectively.

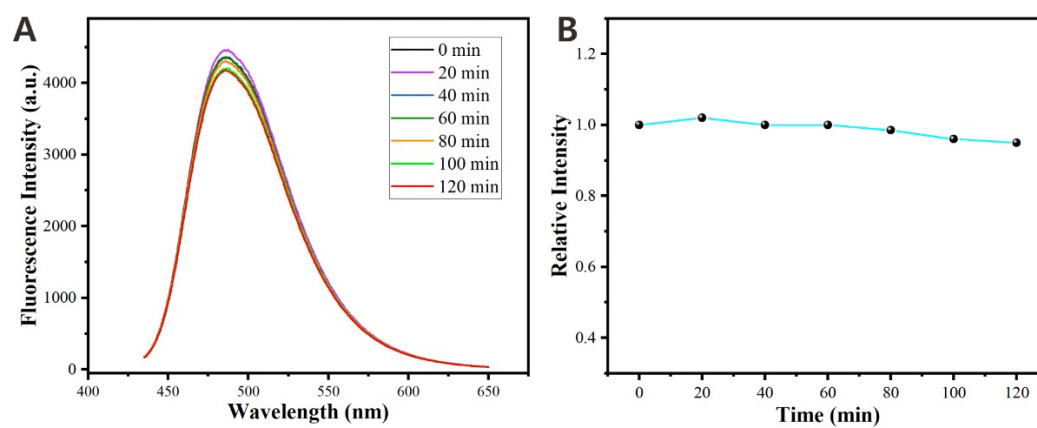

**Fig. S4.** (A) Fluorescence spectra of the SiNDs solution radiated by UV-light for different time. (B) Relative intensity of the SiNDs solution radiated by UV-light for different time.

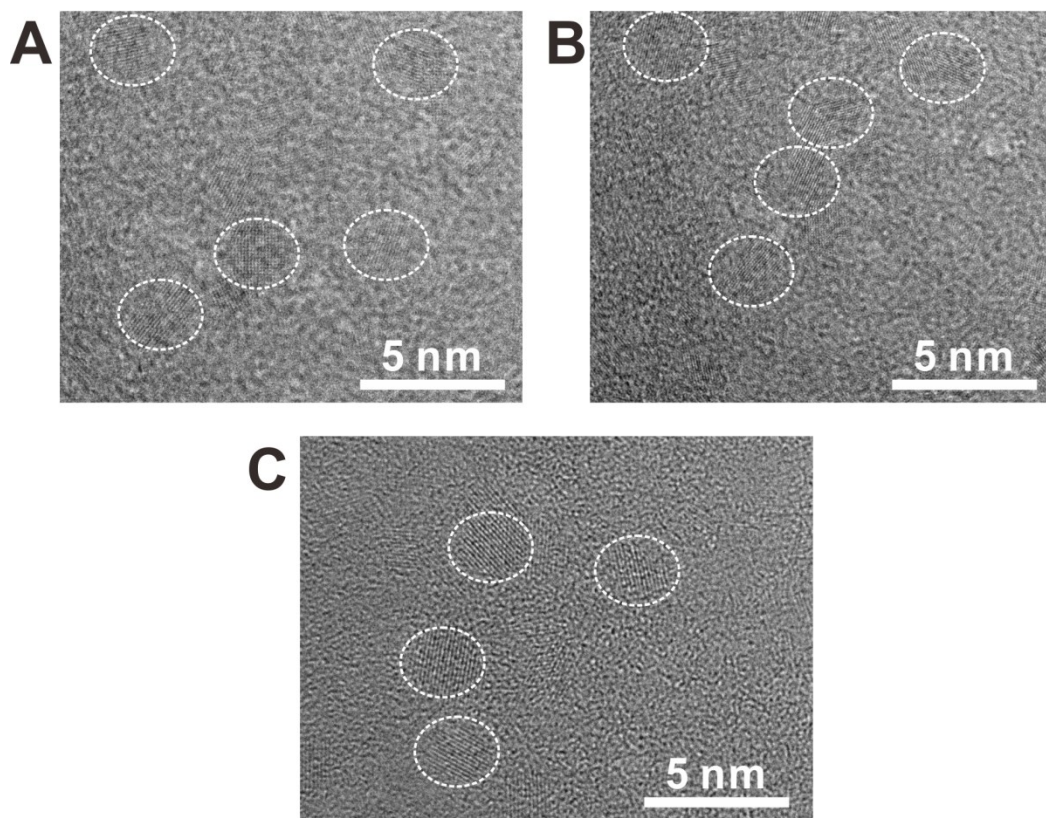

**Fig. S5.** HRTEM images of SiNDs mixed with  $\text{MnO}_4^-$  (A), SiNDs mixed with  $\text{MnO}_4^- + \text{H}_2\text{O}_2$  (B), SiNDs mixed with  $\text{MnO}_4^- + \text{glucose}$  (C).

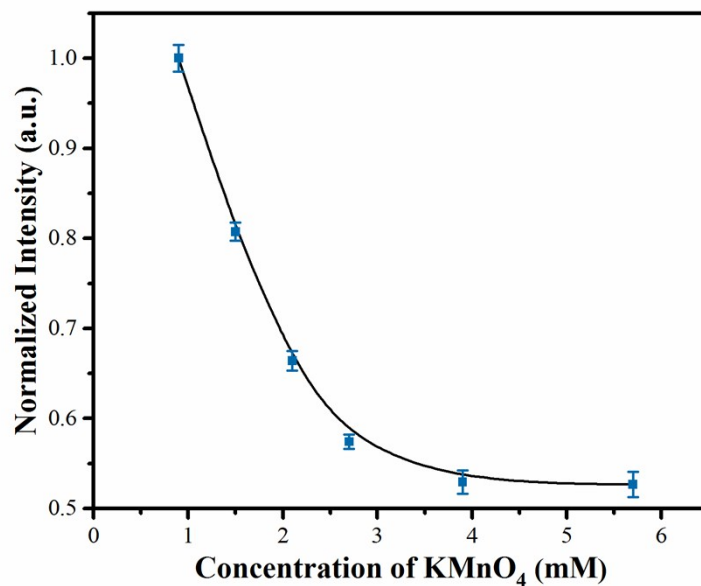

**Fig. S6.** Fluorescence intensity of SiNDs solution mixed with different concentrations of potassium permanganate.

**Table S1** The lifetime and fluorescence intensity of SiNDs solution mixed with different concentrations of potassium permanganate: (a) SiNDs, (b) SiNDs + 80  $\mu$ M potassium permanganate, (c) SiNDs + 110  $\mu$ M potassium permanganate, (d) SiNDs + 150  $\mu$ M potassium permanganate.

| Sample   | Fluorescence lifetime | Fluorescence intensity | $\tau/\tau_0$ | $F/F_0$ |
|----------|-----------------------|------------------------|---------------|---------|
| <b>a</b> | 5.559                 | 3269.39                | —             | —       |
| <b>b</b> | 4.721                 | 2568.35                | 0.8493        | 0.7856  |
| <b>c</b> | 4.176                 | 2000.37                | 0.7512        | 0.6118  |
| <b>d</b> | 3.913                 | 1356.87                | 0.7039        | 0.4150  |

**Table S2** Comparison of the method for H<sub>2</sub>O<sub>2</sub> and glucose detection in this work with some previously reported strategies.

| <b>Target</b>                     | <b>Main material</b>                               | <b>LOD</b>     | <b>Reference</b> |
|-----------------------------------|----------------------------------------------------|----------------|------------------|
| H <sub>2</sub> O <sub>2</sub>     | MIL-53(Fe) nanozyme                                | 7.5 nM         | [1]              |
| H <sub>2</sub> O <sub>2</sub>     | Maleimide-functionalized tetraphenylethene         | 10 nM          | [2]              |
| H <sub>2</sub> O <sub>2</sub>     | CeO <sub>2</sub> nanoparticle                      | 0.13 μM        | [3]              |
| H <sub>2</sub> O <sub>2</sub>     | Phthalic acid-Tb-Cu-MOF                            | 0.2 μM         | [4]              |
| H <sub>2</sub> O <sub>2</sub>     | Gold nanocluster                                   | 0.8 μM         | [5]              |
| H <sub>2</sub> O <sub>2</sub>     | Upconversion nanoparticles                         | 0.9 μM         | [6]              |
| H <sub>2</sub> O <sub>2</sub>     | Copper nanoparticle                                | 2.6 μM         | [7]              |
| <b>H<sub>2</sub>O<sub>2</sub></b> | <b>Silicon nanodots</b>                            | <b>2.8 nM</b>  | <b>This work</b> |
| Glucose                           | Maleimide-functionalized tetraphenylethene         | 0.05 μM        | [2]              |
| Glucose                           | Graphitic C <sub>3</sub> N <sub>4</sub> nanosheets | 0.4 μM         | [8]              |
| Glucose                           | Carbon nanodots                                    | 1.39 μM        | [9]              |
| Glucose                           | Silver nanoparticles                               | 2.5 μM         | [10]             |
| Glucose                           | Upconversion nanoparticles                         | 3.7 μM         | [6]              |
| Glucose                           | Copper nanoparticle                                | 8.5 μM         | [7]              |
| Glucose                           | CeO <sub>2</sub> nanoparticle                      | 8.9 μM         | [3]              |
| <b>Glucose</b>                    | <b>Silicon nanodots</b>                            | <b>0.11 μM</b> | <b>This work</b> |

## References

- [1] T. Lin, Y. Qin, Y. Huang, R. Yang, L. Hou, F. Ye, S. Zhao, *Chem. Commun.* **2018**, *54*, 1762-1765.
- [2] J. Chang, H. Li, T. Hou, W. Duan, F. Li, *Biosens. Bioelectron.* **2018**, *104*, 152-157.
- [3] B. Liu, Z. Sun, P. J. Huang, J. Liu, *J. Am. Chem. Soc.* **2015**, *137*, 1290-1295.
- [4] Z. Qi, L. Wang, Q. You, Y. Chen, *Biosens. Bioelectron.* **2017**, *96*, 227-232.
- [5] H. C. Chang, J. A. Ho, *Anal. Chem.* **2015**, *87*, 10362-10367.
- [6] J. Yuan, Y. Cen, X. J. Kong, S. Wu, C. L. Liu, R. Q. Yu, X. Chu, *ACS Appl. Mater. Interfaces* **2015**, *7*, 10548-10555.
- [7] J. Chen, X. Ji, Z. He, *Anal. Chem.* **2017**, *89*, 3988-3995.
- [8] W. Zhang, X. Li, X. Xu, Y. He, F. Qiu, J. Pan, X. Niu, *J. Mater. Chem. B* **2019**, *7*, 233-239.
- [9] J. L. Ma, B. C. Yin, X. Wu, B. C. Ye, *Anal. Chem.* **2017**, *89*, 1323-1328.
- [10] J. Li, Y. Li, S. A. Shahzad, J. Chen, Y. Chen, Y. Wang, M. Yang, C. Yu, *Chem. Commun.* **2015**, *51*, 6354-6356.
